# Supplementary material
Source: PubMed Central journal article supplement (PMC4899126)
Supplement: NIHMS776551-supplement-1.pdf [file NIHMS776551-supplement-1.pdf]

| Reference model: <i>R.i.</i> RT               |       |          |       |        |
|-----------------------------------------------|-------|----------|-------|--------|
|                                               | Prp8  | HCV NS5B | TERT  | HIV RT |
| Dali <i>de novo</i> search Z-score            | 15.4  | 14.9     | 8.9   | 7.4    |
| TM-score                                      | 0.698 | 0.682    | 0.534 | 0.505  |
| Dali pairwise alignment Z-score               | 15.4  | 14.6     | 11.2  | 10.5   |
| Reference model: <i>R.i.</i> RT- $\Delta$ RT0 |       |          |       |        |
| TM-score                                      | 0.700 | 0.671    | 0.646 | 0.586  |
| Dali pairwise alignment Z-score               | 12.3  | 12.0     | 12.2  | 10.5   |

**Supplementary Table 1: TM-align scores and Dali pairwise alignment Z-scores for the alignment between *R.i.* RT domain and various RT or RT-like domains.** The *de novo* Dali search was only performed using complete *R.i.* RT monomer (*R.i.* RT, top row) as the query structure because *R.i.* RT monomer without the RT0 motif (*R.i.* RT- $\Delta$ RT0) failed to identify additional significant hits besides Prp8 and HCV NS5B. In structural alignments, either the complete *R.i.* RT monomer (*R.i.* RT, top rows) or the *R.i.* RT monomer without the RT0 motif (*R.i.* RT- $\Delta$ RT0, bottom rows) were used as references as indicated in the table heading. The target structures for comparison are the finger and palm subdomains from Prp8 (PDBID: 4I43, residues 882–1303)<sup>32</sup>, HCV RNA polymerase (PDBID: 1C2P, residues 1–385)<sup>42</sup>, TERT (PDBID: 3DU6, residues 151–406)<sup>40</sup> and HIV RT p66 subunit (PDBID: 2HMI, residues 1–246)<sup>41</sup>. The TM-scores were produced by TM-align<sup>44</sup> with a value between 0–1. Higher TM-score indicates higher structural similarity. The Dali pairwise alignment Z-scores were produced by the Dali pairwise alignment server<sup>43</sup> and similarly higher Z-score suggests higher structural similarity.
